# Supplementary material for: Systemic inflammatory response syndrome criteria and the prediction of hospital mortality in critically ill patients: a retrospective cohort study
Source: PubMed Central journal article supplement (PMC5632974; doi:10.5935/0103-507x.20170047), 2017
Supplement: rbti-29-03-0317-suppl01.pdf [file rbti-29-03-0317-suppl01.pdf]

## Systemic inflammatory response syndrome criteria and the prediction of hospital mortality in critically ill patients: a retrospective cohort study

*Critérios para síndrome de resposta inflamatória sistêmica e previsão de mortalidade hospitalar em pacientes críticos: estudo retrospectivo de coorte*

Leandro Utino Taniguchi, Ellen Maria Campos Pires, José Mauro Vieira Jr., Luciano Cesar Pontes de Azevedo

**Table S1** - General characteristics of the patients with known and unknown systemic inflammatory response syndrome status at intensive care unit admission

|                                                     | Known SIRS status | Unknown SIRS status | p value |
|-----------------------------------------------------|-------------------|---------------------|---------|
| N                                                   | 932 (40)          | 1,400 (60)          |         |
| Age (SD) (years)                                    | 66.2 (17.8)       | 67.2 (18)           | 0.20    |
| Male                                                | 55.8              | 55.8                | 0.72    |
| SAPS 3                                              | 42 [33 - 53]      | 42 [32 - 50]        | 0.01    |
| Admission type                                      |                   |                     | 0.1     |
| Medical                                             | 48.6              | 49.6                |         |
| Urgent surgery                                      | 9.9               | 12.2                |         |
| Elective surgery                                    | 39.1              | 38.2                |         |
| Length of hospital stay before ICU admission (days) | 1 [0 - 2]         | 1 [0 - 3]           | 0.26    |
| Mechanical ventilation                              | 21.2              | 19.6                | 0.26    |
| Vasoactive drugs                                    | 35                | 31.7                | 0.10    |
| Dialysis                                            | 6.1               | 5.6                 | 0.49    |
| Hospital mortality                                  | 13.4              | 12.3                | 0.82    |

SIRS - systemic inflammatory response syndrome; SD - standard deviation; SAPS 3 - Simplified Acute Physiology Score 3; ICU - intensive care unit. Among the 2,332 patients evaluated, 85.3% had data related to heart rate, respiratory rate and body temperature at ICU admission. Forty percent had leukocytes counts at ICU admission. Numeric values are expressed as N (%), % and the median [25<sup>th</sup> - 75<sup>th</sup> percentiles].

**Table S2** - Risk factors associated with being systemic inflammatory response syndrome-positive at intensive care unit admission

| Parameter                               | OR    | 95%CI        | p value |
|-----------------------------------------|-------|--------------|---------|
| Infection at admission                  | 1.51  | 1.028 - 2.27 | 0.036   |
| Vasoactive drugs                        | 1.51  | 1.13 - 2.02  | 0.006   |
| Admission from the wards                | 1.86  | 1.15 - 2.99  | 0.012   |
| Admission from interventional radiology | 0.302 | 0.096 - 0.96 | 0.042   |
| Admission from intermediate care unit   | 9.75  | 1.26 - 75.31 | 0.029   |

OR - odds ratio; 95%CI - 95% confidence interval. Hosmer-Lemeshow  $\chi^2$  p = 0.76.

**Table S3** - Multivariate models for hospital mortality prediction**Model 1** - Multivariate model with SIRS criteria as a binomial variable (< 2 or ≥ 2 criteria)

| Parameter                          | OR   | 95%CI       | p value |
|------------------------------------|------|-------------|---------|
| Probability of being SIRS-positive | 1.04 | 1.02 - 1.07 | 0.001   |
| Modified SAPS 3*                   | 1.07 | 1.05 - 1.09 | < 0.001 |
| SIRS (dichotomous)                 | 1.82 | 1.12 - 2.96 | 0.016   |

OR - odds ratio; 95%CI - 95% confidence interval; SIRS - systemic inflammatory response syndrome; SAPS 3 - Simplified Acute Physiology Score 3. \* Modified SAPS 3: SAPS 3 with the exclusion of SIRS components. Hosmer-Lemeshow  $\chi^2$  p = 0.015.

**Model 2** - Multivariate model with SIRS criteria as an ordinal variable (0 - 4 criteria)

| Parameter                          | OR   | 95%CI       | p value |
|------------------------------------|------|-------------|---------|
| Probability of being SIRS-positive | 1.04 | 1.02 - 1.07 | 0.001   |
| Modified SAPS 3*                   | 1.07 | 1.05 - 1.09 | < 0.001 |
| SIRS (ordinal)                     | 1.29 | 1.03 - 1.60 | 0.024   |

OR - odds ratio; 95%CI - 95% confidence interval; SIRS - systemic inflammatory response syndrome; SAPS 3 - Simplified Acute Physiology Score 3. \* Modified SAPS 3: SAPS 3 with the exclusion of SIRS components. Hosmer-Lemeshow  $\chi^2$  p = 0.15.
